# Supplementary material
Source: PubMed Central journal article supplement (PMC3416380)
Supplement: supp_78.14.5013_AEM00782-12_TableS1.pdf [file supp_78.14.5013_AEM00782-12_TableS1.pdf]

## Supplementary Table 1. Oligonucleotides used for cloning

---

|                                                      |                                                  |
|------------------------------------------------------|--------------------------------------------------|
| 5'-GCT <u>AGATCT</u> ATGGAGGCTGACGGCCGG <sup>a</sup> | amplification of truncated <i>phypA</i> -forward |
| 5'-GGT <u>AAGCTT</u> TCAAGCCTCCGGCGGGAACGCC          | amplification of truncated <i>phypA</i> -reverse |
| 5'-GCT <u>AGATCT</u> TGGGGAAGGAACCGCCCGG             | amplification of truncated <i>phylA</i> -forward |
| 5'-CAGA <u>AAGCTT</u> CAGCGACGCATACGCCACAC           | amplification of truncated <i>phylA</i> -reverse |

---

<sup>a</sup>Restriction sites (BamHI and HindIII) introduced for cloning are underlined.
